# Supplementary material for: Effect of fermentation with single and co-culture of lactic acid bacteria on okara: evaluation of bioactive compounds and volatile profiles
Source: Royal Society of Chemistry journal article supplement (doi:10.1039/d0fo02916e), 2021-01-01
Supplement: d0fo02916e1.pdf [file d0fo02916e1.pdf]

**Table S1** Assignment of GC-MS signals

| Peak no. | Identification             | LRI  | Identification Method | Reference |
|----------|----------------------------|------|-----------------------|-----------|
| 1        | Heptane                    | 790  | MS                    |           |
| 2        | Octane                     | 829  | MS                    |           |
| 3        | Acetone                    | 843  | MS + LRI              | 1         |
| 4        | 2-Butanone                 | 911  | MS + LRI              | 2         |
| 5        | 2-Methyl propanal          | 913  | MS + LRI              | 2         |
| 6        | Propan-2-ol                | 939  | MS + LRI              | 1         |
| 7        | Ethanol                    | 955  | MS + LRI              | 1         |
| 8        | Furan, 2-ethyl             | 976  | MS + LRI              | 3         |
| 9        | Pentanal                   | 1012 | MS + LRI              | 4         |
| 10       | Hexanal                    | 1107 | MS + LRI              | 4         |
| 11       | 2-n-Butyl furan            | 1146 | MS + LRI              | 5         |
| 12       | 2-Heptanone                | 1210 | MS + LRI              | 4         |
| 13       | Heptanal                   | 1213 | MS+ LRI               | 4         |
| 14       | 1-Butanol,3-methyl         | 1231 | MS + LRI              | 2         |
| 15       | 1-Pentanol                 | 1232 | MS + LRI              | 3         |
| 16       | Furan, 2-pentyl            | 1255 | MS + LRI              | 3         |
| 17       | 2-Octanone                 | 1310 | MS + LRI              | 4         |
| 18       | Octanal                    | 1313 | MS + LRI              | 4         |
| 19       | 2-Butanone,3-hydroxy-      | 1315 | MS + LRI              | 2         |
| 20       | Furan, 2-(1-pentenyl)-(E)  | 1325 | MS                    |           |
| 21       | 2-Heptenal                 | 1351 | MS + LRI              | 4         |
| 22       | 1-Hexanol                  | 1375 | MS + LRI              | 3         |
| 23       | 3-Octanol                  | 1415 | MS + LRI              | 6         |
| 24       | Nonanal                    | 1419 | MS + LRI              | 4         |
| 25       | 3-Octen-2-one              | 1434 | MS + LRI              | 5         |
| 26       | 2-Octenal (E)              | 1458 | MS + LRI              | 4         |
| 27       | 1-Octen-3-ol               | 1473 | MS                    |           |
| 28       | 1-Heptanol                 | 1478 | MS + LRI              | 2         |
| 29       | Furfural                   | 1495 | MS + LRI              | 2         |
| 30       | 4-Ethylcyclohexanol        | 1506 | MS                    |           |
| 31       | Decanal                    | 1526 | MS + LRI              | 4         |
| 32       | Benzaldehyde               | 1556 | MS + LRI              | 7         |
| 33       | 1-Octanol                  | 1581 | MS + LRI              |           |
| 34       | 3,5-Octadien-2-one         | 1601 | MS                    |           |
| 35       | 2-Undecanone               | 1626 | MS + LRI              | 4         |
| 36       | 2-Octen-1-ol               | 1640 | MS + LRI              | 8         |
| 37       | Dodecanal                  | 1739 | MS + LRI              | 4         |
| 38       | Benzaldehyde, 4-ethyl      | 1742 | MS                    |           |
| 39       | Benzaldehyde, 2,5-dimethyl | 1742 | MS                    |           |
| 40       | 2,4-Decadienal             | 1797 | MS + LRI              | 4         |
| 41       | Benzyl Alcohol             | 1909 | MS + LRI              | 9         |
| 42       | Phenylethyl Alcohol        | 1945 | MS + LRI              | 9         |

## References

- 1 G. Castello, S.Vezzani and T. C. Gerbino, Gas chromatographic separation and automatic identification of complex mixtures of organic solvents in industrial wastes, *J. Chromatogr. A Journal of Chromatography A*, 1991, **585.2**, 273–280. <https://doi.org/10.1016/0021->

9673(91)85088-W

- 2 F. Bianchi, M. Careri, A. Mangia and M. Musci, Retention indices in the analysis of food aroma volatile compounds in temperature-programmed gas chromatography: Database creation and evaluation of precision and robustness *J. Sep. Sci. Journal of Separation Science*, 2007, **30.4**, 563–572. <https://doi.org/10.1002/jsse.200600393>
- 3 B. Girard and T. Durance, Headspace volatiles of sockeye and pink salmon as affected by retort process, *J. Food Sci. Journal of Food Science*, 2000, **65.1**, 34–39. <https://doi.org/10.1111/j.1365-2621.2000.tb15952.x>
- 4 S. Rochat and A. Chaintreau, Carbonyl odorants contributing to the in-oven roast beef top note, *J. Agric. Food Chem. Journal of Agricultural and Food Chemistry*, 2005, **53.24**, 9578–9585. <https://doi.org/10.1021/jf058089l>
- 5 J. S. Elmore, I. Nisyrios and D.S. Mottram, Analysis of the headspace aroma compounds of walnuts (*Juglans regia* L.), *Flavour Fragr. J. Flavour and Fragrance Journal*, 2005, **20.5**, 501–506. <https://doi.org/10.1002/ffj.1477>
- 6 I. M. Chung, S.H. Seo, J.K. Ahn and S. H. Kim, Effect of processing, fermentation, and aging treatment to content and profile of phenolic compounds in soybean seed, soy curd and soy paste, *Food Chemistry*, 2011, **127.3**, 960–967. <https://doi.org/10.1016/j.foodchem.2011.01.065>
- 7 C. Da Porto, L. Pizzale, M. Bravin and L.S. Conte, Analyses of orange spirit flavour by direct-injection gas chromatography–mass spectrometry and headspace solid-phase microextraction/GC–MC, *Flavour Fragr. J. Flavour and Fragrance Journal*, 2003, **18.1**, 66–72. <https://doi.org/10.1002/ffj.1164>
- 8 K. C. Wong and F. Y. Lai, Volatile constituents from the fruits of four *Syzygium* species grown in Malaysia, *Flavour Fragr. J. Flavour and Fragrance Journal*, 1996, **11.1**, 61–66. [https://doi.org/10.1002/\(SICI\)1099-1026\(199601\)11:1<61::AID-FFJ539>3.0.CO;2-1](https://doi.org/10.1002/(SICI)1099-1026(199601)11:1<61::AID-FFJ539>3.0.CO;2-1)
- 9 J. H. Loughrin, T. R. Hamilton-Kemp, R. A. Andersen and D. F. Hildebrand, Headspace compounds from flowers of *Nicotiana tabacum* and related specie, *J. Agric. Food Chem. Journal of Agricultural and Food Chemistry*, 1990, **38.2**, 455–460. <https://doi.org/10.1021/jf00092a027>
