# Supplementary material for: Effect of fermentation with single and co-culture of lactic acid bacteria on okara: evaluation of bioactive compounds and volatile profiles
Source: Royal Society of Chemistry journal article supplement (doi:10.1039/d0fo02916e), 2021-01-01
Supplement: d0fo02916e2.pdf [file d0fo02916e2.pdf]

**Table S2.** Chromatographic area of minor components in unfermented and fermented okara samples analyzed through UHPLC MS<sup>n</sup>

| Compound                                          | Okara sample           |                                         |                                          |                             |                         |
|---------------------------------------------------|------------------------|-----------------------------------------|------------------------------------------|-----------------------------|-------------------------|
|                                                   | Control                | <i>L.</i><br><i>acidophilus</i><br>8151 | <i>P.</i><br><i>acidilactici</i><br>3992 | <i>L. rhamnosus</i><br>1473 | Co-culture              |
| Tryptophan                                        | 19960±415 <sup>a</sup> | 11295±2053 <sup>c</sup>                 | 14718±1138 <sup>b</sup>                  | 17904±1670 <sup>a,d</sup>   | 2668±678 <sup>e</sup>   |
| Naringenin                                        | 12719±107 <sup>d</sup> | 30501±2479 <sup>b</sup>                 | 20044±3301 <sup>c</sup>                  | 52930±2500 <sup>a</sup>     | 51338±5024 <sup>a</sup> |
| Naringenin- <i>O</i> -hexoside I                  | 13162±440 <sup>a</sup> | 8412±660 <sup>c</sup>                   | 11799±1085 <sup>b</sup>                  | 2098±225 <sup>d</sup>       | ND                      |
| Naringenin- <i>O</i> -hexoside II                 | 15803±20 <sup>a</sup>  | 4353±796 <sup>c</sup>                   | 6535±784 <sup>b</sup>                    | ND                          | ND                      |
| Naringenin- <i>O</i> -hexoside III                | 4496±591 <sup>a</sup>  | 5084±643 <sup>a</sup>                   | 4950±932 <sup>a</sup>                    | 3702±258 <sup>b</sup>       | 3267±170 <sup>b</sup>   |
| 2-Hydroxyvaleric acid or 2-Hydroxyisovaleric acid | ND                     | 4984±656 <sup>b</sup>                   | ND                                       | NQ                          | 6351±531 <sup>a</sup>   |
| 2-Hydroxyisocaproic acid (Leucic acid)            | ND                     | 38481±2727 <sup>a</sup>                 | 4979±760 <sup>c,d</sup>                  | 7986±1727 <sup>c</sup>      | 32467±2063 <sup>b</sup> |
| Vanillic acid- <i>O</i> -hexoside                 | 7942±245 <sup>a</sup>  | 8832±1414 <sup>a,b</sup>                | 7140±393 <sup>a,c</sup>                  | ND                          | ND                      |
| Syringic acid- <i>O</i> -hexoside                 | 13780±273 <sup>a</sup> | 13349±1364 <sup>a</sup>                 | 12947±510 <sup>a</sup>                   | ND                          | 2364±472 <sup>b</sup>   |

Data are expressed as arbitrary units (mean values ± sd, with n=3 for control and n= 4 for fermented okara samples). nd: not detected; nq: s/n too low (<10). different letters showed significant differences by ANOVA at  $p < 0.05$ .
